# Supplementary material
Source: publisher site journal article supplement (https://www.spandidos-publications.com/4187/downloadSupplementary)
Supplement: Supplementary file 1 [file downloadSupplementary]

Table SI. Surgical complexity score at the University of Science and Technology of China.

| Organs                              | Score | Comments        |
|-------------------------------------|-------|-----------------|
| TH-BSO                              | 1     |                 |
| Omentectomy                         | 1     |                 |
| Pelvic lymphadenectomy              | 1     |                 |
| Para-aortic lymphadenectomy         | 1     |                 |
| Abdominal peritoneum stripping      | 1     |                 |
| Pelvic peritoneum stripping         | 1     |                 |
| Recto-sigmoidectomy-T-T anastomosis | 3     |                 |
| Large bowel resection               | 2     | Including stoma |
| Diaphragm stripping/resection       | 2     |                 |
| Diaphragm burning                   | 1     |                 |
| Splenectomy                         | 2     |                 |
| Liver resection                     | 2     |                 |
| Small bowel resection               | 1     |                 |
| Groin lymphadenectomy               | 1     |                 |
| Partial gastrectomy                 | 1     |                 |
| Total colon-T-T anastomosis         | 3     |                 |
| Lesser sac                          | 2     |                 |
| Ureter resection and anastomosis    | 2     |                 |
| Diaphragm resection-repair          | 3     |                 |
| Total/part nephrectomy resection    | 2     |                 |
| Gallbladder resection               | 2     |                 |
| Pancreatic tail or body resection   | 2     |                 |
| Cardio-phrenic lymphadenectomy      | 3     |                 |
| Portal lymphadenectomy              | 3     |                 |

TH-BSO, total hysterectomy-bilateral salpingo oophorectomy.

Table SII. Clavien-Dindo classification of surgical complications.

| Grade      | Definition                                                                                                                                                                                                                                                                                                                                              |
|------------|---------------------------------------------------------------------------------------------------------------------------------------------------------------------------------------------------------------------------------------------------------------------------------------------------------------------------------------------------------|
| 1          | Any deviation from the normal postoperative course without the need for pharmacological treatment or surgical, endoscopic, and radiological interventions. Allowed therapeutic regimens are: Drugs as antiemetics, antipyretics, analgetics, diuretics, electrolytes and physiotherapy. This grade also includes wound infections opened at the bedside |
| 2          | Requiring pharmacological treatment with drugs other than such allowed for grade I complications. Blood transfusions and total parenteral nutrition are also included                                                                                                                                                                                   |
| 3          | Requiring surgical, endoscopic or radiological intervention                                                                                                                                                                                                                                                                                             |
| 3a         | Intervention not under general anesthesia                                                                                                                                                                                                                                                                                                               |
| 3b         | Intervention under general anesthesia                                                                                                                                                                                                                                                                                                                   |
| 4          | Life-threatening complication (including CNS complications) <sup>a</sup> requiring IC/ICU management                                                                                                                                                                                                                                                    |
| 4a         | Single organ dysfunction (including dialysis)                                                                                                                                                                                                                                                                                                           |
| 4b         | Multiorgan dysfunction                                                                                                                                                                                                                                                                                                                                  |
| 5          | Death of a patient                                                                                                                                                                                                                                                                                                                                      |
| Suffix “d” | If the patient suffers from a complication at the time of discharge (see examples in Table II), the suffix “d” (for “disability”) is added to the respective grade of complication. This label indicates the need for a follow-up to fully evaluate the complication                                                                                    |

<sup>a</sup>Brain hemorrhage, ischemic stroke, subarachnoidal bleeding, but excluding transient ischemic attacks.

CNS, central nervous system; IC, intermediate care; ICU, intensive care unit.

Table SIII. Characteristics of patients with grade 3-5 postoperative complications (n=15).

| Case | BMI, kg/m <sup>2</sup> | FIGO Stage | ALB, g/l | Comorbid illnesses           | ASA score | CA125, U/ml | Ascites, ml | Estimated blood loss, ml | Residual disease | SCS | Grade 3-5 postoperative complications                                                                          |
|------|------------------------|------------|----------|------------------------------|-----------|-------------|-------------|--------------------------|------------------|-----|----------------------------------------------------------------------------------------------------------------|
| 1    | 18.7                   | IIIC       | 35.8     |                              | 2         | 1023        | 2500        | 1500                     | R0               | 13  | Pancreatic leak requiring drainage, gastric fistula requiring drainage (splenectomy and distal pancreatectomy) |
| 2    | 21.9                   | IV         | 37.1     | Hypertension                 | 2         | 3035        | 1000        | 1000                     | R0               | 6   | Pancreatic leak requiring drainage (splenectomy)                                                               |
| 3    | 17.5                   | IV         | 38.9     |                              | 2         | 1489        | 3500        | 2500                     | R0               | 7   | Bladder fistula requiring surgery                                                                              |
| 4    | 28.7                   | IV         | 36.7     |                              | 2         | 519         | 7000        | 3000                     | R0               | 12  | Closure of dehiscence non-infected wound under general anesthesia                                              |
| 5    | 24.7                   | IV         | 38.3     | Hypertension, renal calculus | 3         | 392         | 100         | 600                      | R0               | 6   | Closure of dehiscence non-infected wound under general anesthesia                                              |
| 6    | 24.0                   | IV         | 44.5     |                              | 3         | 1637        | 500         | 3500                     | R0               | 18  | Closure of dehiscence non-infected wound under general anesthesia                                              |
| 7    | 21.5                   | IV         | 26.9     | Hypertension                 | 2         | 5000        | 4500        | 1500                     | R0               | 8   | Closure of dehiscence non-infected wound under general anesthesia                                              |
| 8    | 20.8                   | IV         | 38.2     |                              | 2         | 1146        | 2000        | 600                      | R1               | 10  | Closure of dehiscence non-infected wound under general anesthesia                                              |
| 9    | 23.2                   | IV         | 42.5     |                              | 3         | 2319        | 200         | 3000                     | R0               | 7   | Closure of dehiscence non-infected wound under general anesthesia                                              |
| 10   | 26.6                   | IIIC       | 41.4     |                              | 2         | 2188        | 500         | 1200                     | R0               | 6   | Closure of dehiscence non-infected wound under general anesthesia                                              |
| 11   | 26.3                   | IIIC       | 40.5     |                              | 3         | 2293        | 2000        | 1200                     | RX               | 4   | Closure of dehiscence non-infected wound under general anesthesia                                              |
| 12   | 22.8                   | IV         | 41.3     |                              | 3         | 4649        | 500         | 1500                     | R0               | 15  | Closure of dehiscence non-infected wound                                                                       |

|    |      |      |      |                                    |   |      |      |      |    |    |                                                                                                    |
|----|------|------|------|------------------------------------|---|------|------|------|----|----|----------------------------------------------------------------------------------------------------|
|    |      |      |      |                                    |   |      |      |      |    |    | under general anesthesia                                                                           |
| 13 | 20.7 | IIIC | 34.8 | Somnipathy                         | 3 | 2619 | 3000 | 2000 | R0 | 13 | Acute respiratory failure requiring intubation                                                     |
| 14 | 25.9 | IV   | 47.4 | Cervical cancer after radiotherapy | 3 | 265  | 600  | 1000 | R0 | 6  | Rectum fistula requiring surgery                                                                   |
| 15 | 27.2 | IV   | 28.9 | -                                  | 3 | 1735 | 3000 | 2000 | R0 | 12 | Acute respiratory failure requiring intubation, acute cardiopulmonary failure, septic shock, death |

BMI, body mass index; ALB, albumin; ASA, American Society of Anesthesiologists; SCS, surgical complexity score; FIGO, Federation International of Gynecology and Obstetrics; CA125, cancer antigen 125.

Table SIV. Distribution of complications.

| Number of complications | Grade 1-2 | Grade 3-5 |
|-------------------------|-----------|-----------|
| 1                       | 17        | 11        |
| 2                       | 10        | 3         |
| 3                       | 4         | 0         |
| 4                       | 2         | 1         |
| Total                   | 33        | 15        |

Table SV. Characteristics of patients with full-thickness diaphragm resection (n=16).

| Case | BMI,<br>kg/m <sup>2</sup> | FIGO<br>Stage | ALB,<br>g/l | Comorbid<br>illnesses       | ASA<br>score | CA125,<br>U/ml | Ascites,<br>ml | Estimated<br>blood<br>loss, ml | Residual<br>disease | SCS | Mesh | Right<br>cardio-phrenic<br>angle lymph<br>node resection | Grade 3-5<br>post-operative<br>complications                                                                            |
|------|---------------------------|---------------|-------------|-----------------------------|--------------|----------------|----------------|--------------------------------|---------------------|-----|------|----------------------------------------------------------|-------------------------------------------------------------------------------------------------------------------------|
| 1    | 24.6                      | IIIC          | 42.7        | Hypertension,<br>diabetes   | 2            | 1332           | 2000           | 3000                           | R0                  | 17  | Yes  | Yes                                                      |                                                                                                                         |
| 2    | 24.0                      | IV            | 44.5        | -                           | 3            | 1637           | 500            | 3500                           | R0                  | 18  | Yes  | -                                                        | Closure of<br>dehiscent<br>non-infected<br>wound under<br>local anesthesia                                              |
| 3    | 21.5                      | IV            | 26.9        | Hypertension                | 2            | 5000           | 4500           | 1500                           | R0                  | 8   | -    | -                                                        | Closure of<br>dehiscent<br>non-infected<br>wound under<br>local anesthesia                                              |
| 4    | 20.2                      | IV            | 40.3        | -                           | 3            | 1821           | 3000           | 6000                           | R0                  | 12  | -    | -                                                        | -                                                                                                                       |
| 5    | 17.7                      | IV            | 29.6        | History of<br>breast cancer | 1            | 247            | 500            | 1000                           | R0                  | 11  | -    | -                                                        |                                                                                                                         |
| 6    | 27.2                      | IV            | 28.9        | -                           | 2            | 1734           | 3000           | 2000                           | R0                  | 12  | -    | -                                                        | Acute<br>respiratory<br>failure requiring<br>intubation, acute<br>cardiopulmonary<br>failure, septic<br>shock and death |

|    |      |      |      |                                                    |   |      |       |      |    |    |     |     |   |
|----|------|------|------|----------------------------------------------------|---|------|-------|------|----|----|-----|-----|---|
| 7  | 23.2 | IV   | 37.0 | Hypertension,<br>cerebral<br>infarction<br>history | 2 | 1108 | 3500  | 2400 | R0 | 22 | Yes | Yes |   |
| 8  | 19.5 | IV   | 36.0 |                                                    | 3 | 7458 | 1000  | 800  | R0 | 11 | -   | -   | - |
| 9  | 22.2 | IV   | 45.9 |                                                    | 3 | 1595 | 5000  | 1000 | R1 | 6  | -   | -   | - |
| 10 | 24.8 | IIIC | 44.8 | Hypertension                                       | 3 | 330  | 600   | 800  | R0 | 11 | Yes | -   | - |
| 11 | 26.2 | IV   | 40.4 |                                                    | 2 | 3779 | 2000  | 1000 | R0 | 14 | Yes | -   | - |
| 12 | 25.7 | IIIC | 39.8 | Uterine clear<br>cell<br>carcinoma                 | 3 | 844  | 2000  | 1000 | R0 | 17 | -   | -   | - |
| 13 | 25.8 | IIIC | 48.5 |                                                    | 3 | 2024 | 0     | 800  | R0 | 12 | -   | -   | - |
| 14 | 23.9 | IVa  | 36.8 |                                                    | 3 | 412  | 4000  | 3000 | R0 | 11 | -   | -   | - |
| 15 | 18.4 | IIIC | 34.8 | Diabetes                                           | 3 | 358  | 3000  | 1500 | R0 | 12 | -   | -   | - |
| 16 | 27.0 | IIIC | 36.0 |                                                    | 3 | 1000 | 10000 | 1000 | R0 | 14 | -   | -   | - |

BMI, Body mass index; ALB, albumin; ASA, American Society of Anesthesiologists; SCS, surgical complexity score; FIGO, Federation International of Gynecology and Obstetrics; CA125, cancer antigen 125.
